# Supplementary material
Source: PubMed Central journal article supplement (PMC9470503)
Supplement: 431_2022_4614_MOESM1_ESM.pdf [file 431_2022_4614_MOESM1_ESM.pdf]

**Supplementary Table 1.** Genetic diagnoses of the children with inborn errors of immunity and indication for hematopoietic stem cell transplant, thymus transplantation or gene therapy (n=123; CMV-infected patients n=25)

| DIAGNOSIS                                                          | Total number of patients (%) | CMV infected n (%) |
|--------------------------------------------------------------------|------------------------------|--------------------|
| <b>SCID</b>                                                        | <b>71</b>                    | <b>11 (15%)</b>    |
| $\gamma$ c deficiency ( <i>IL2RG</i> )                             | 17 (13.8)                    | 2                  |
| SCID, no genetic confirmation                                      | 13 (10.6)                    | 2                  |
| ADA deficiency                                                     | 12 (9.8)                     | 1                  |
| RAG1 deficiency                                                    | 7 (5.7)                      | 2                  |
| IL7R $\alpha$ deficiency                                           | 6 (4.9)                      | 2                  |
| RAG2 deficiency                                                    | 5 (4.1)                      | 1                  |
| JAK3 deficiency                                                    | 3 (2.4)                      | 1                  |
| Artemis deficiency                                                 | 2 (1.6)                      | 0                  |
| CD 3 deficiency                                                    | 2 (1.6)                      | 0                  |
| Moesin deficiency ( <i>MSN</i> )                                   | 1 (0.8)                      | 0                  |
| DNA ligase IV deficiency ( <i>LIG4</i> )                           | 1 (0.8)                      | 0                  |
| ZAP70 deficiency                                                   | 1 (0.8)                      | 0                  |
| AK2 defect                                                         | 1 (0.8)                      | 0                  |
| <b>CID</b>                                                         | <b>41</b>                    | <b>7 (17%)</b>     |
| MHC class II deficiency ( <i>RFXANK</i> )                          | 8 (6.5)                      | 1                  |
| CD40 ligand deficiency                                             | 6 (4.9)                      | 1                  |
| CID, no genetic confirmation                                       | 6 (4.9)                      | 2                  |
| DiGeorge Syndrome ( <i>TBX1</i> )                                  | 2 (1.6)                      | 2                  |
| Purine nucleoside phosphorylase (PNP) deficiency                   | 2 (1.6)                      | 1                  |
| Wiskott-Aldrich syndrome ( <i>WAS</i> )                            | 9 (7.3)                      | 0                  |
| Immunodeficiency with multiple intestinal atresia ( <i>TTC7A</i> ) | 2 (1.6)                      | 0                  |
| Cartilage hair hypoplasia ( <i>RMRP</i> )                          | 2 (1.6)                      | 0                  |
| Nijmegen breakage syndrome ( <i>NBS1</i> )                         | 1 (0.8)                      | 0                  |
| MHC class II deficiency ( <i>RFX5</i> )                            | 1 (0.8)                      | 0                  |
| MHC class II deficiency ( <i>RFXAP</i> )                           | 1 (0.8)                      | 0                  |
| Tricho-Hepato-Enteric Syndrome ( <i>TTC37</i> )                    | 1 (0.8)                      | 0                  |
| <b>Other type of IEL</b>                                           | <b>11</b>                    | <b>7 (63.6%)</b>   |
| IPEX Syndrome ( <i>FOXP3</i> )                                     | 1 (0.8)                      | 1                  |
| ORAI1 deficiency                                                   | 1 (0.8)                      | 1                  |
| LRBA deficiency                                                    | 3 (2.4)                      | 2                  |
| Dyskeratosis Congenita ( <i>DKC1</i> )                             | 2 (1.6)                      | 2                  |
| IKAROS deficiency ( <i>IKZF1</i> )                                 | 1 (0.8)                      | 1                  |
| Dyskeratosis Congenita ( <i>TERC</i> )                             | 1 (0.8)                      | 0                  |
| CTLA4 haploinsufficiency                                           | 1 (0.8)                      | 0                  |
| NFKB1 deficiency                                                   | 1 (0.8)                      | 0                  |

Abbreviations: CID, combined immunodeficiency; CMV, cytomegalovirus; IEL, inborn errors of immunity; SCID, severe combined immunodeficiency
